# Supplementary material
Source: ML conference proceedings conference paper supplement (https://proceedings.neurips.cc/paper_files/paper/2022/hash/57fbe68cb318cad62c4ae4c91c83cba3-Abstract.html)
Supplement: Supplementary file 1 [file 57fbe68cb318cad62c4ae4c91c83cba3-Supplemental-Conference.zip]

Archive with 2 entries (2 files):
- arnpg-full.pdf
- __MACOSX/._arnpg-full.pdf
